# Supplementary material for: Synergistic effect between Cu–Cr bimetallic oxides supported on g-C3N4 for the selective oxidation of toluene to benzaldehyde
Source: Royal Society of Chemistry journal article supplement (doi:10.1039/c9cy00743a), 2019-01-01
Supplement: c9cy00743a1.pdf [file c9cy00743a1.pdf]

*Supporting Material*

**Synergistic effect between Cu-Cr bimetallic oxides supported on  
g-C<sub>3</sub>N<sub>4</sub> for the selective oxidation of toluene to benzaldehyde**

Cai Xu, Xiaozhong Wang \*, Yingqi Chen and Liyan Dai \*

Zhejiang Provincial Key Laboratory of Advanced Chemical Engineering Manufacture  
Technology, College of Chemical and Biological Engineering, Zhejiang University,  
Hangzhou 310027, China

\*Corresponding authors.

(X. Wang) E-mail: wangxiaozhong@zju.edu.cn.

(L. Dai) E-mail: dailiyan@zju.edu.cn; Tel: +86 571 87952693; Fax: +86 571 87953294.

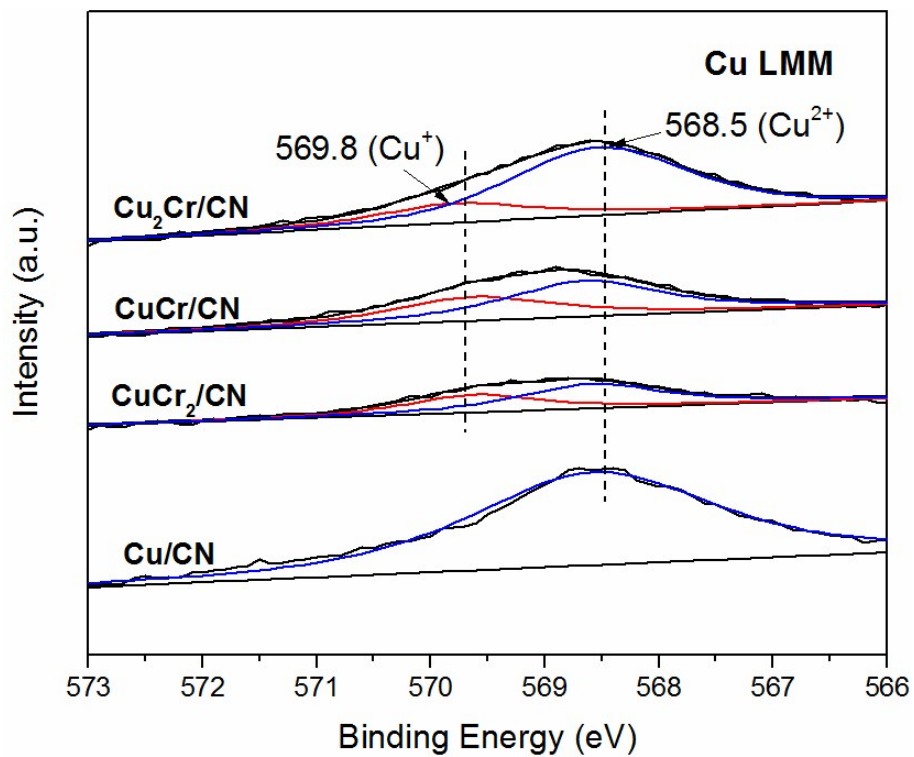

**Fig. S1** Auger spectra of Cu LMM of the prepared catalysts.

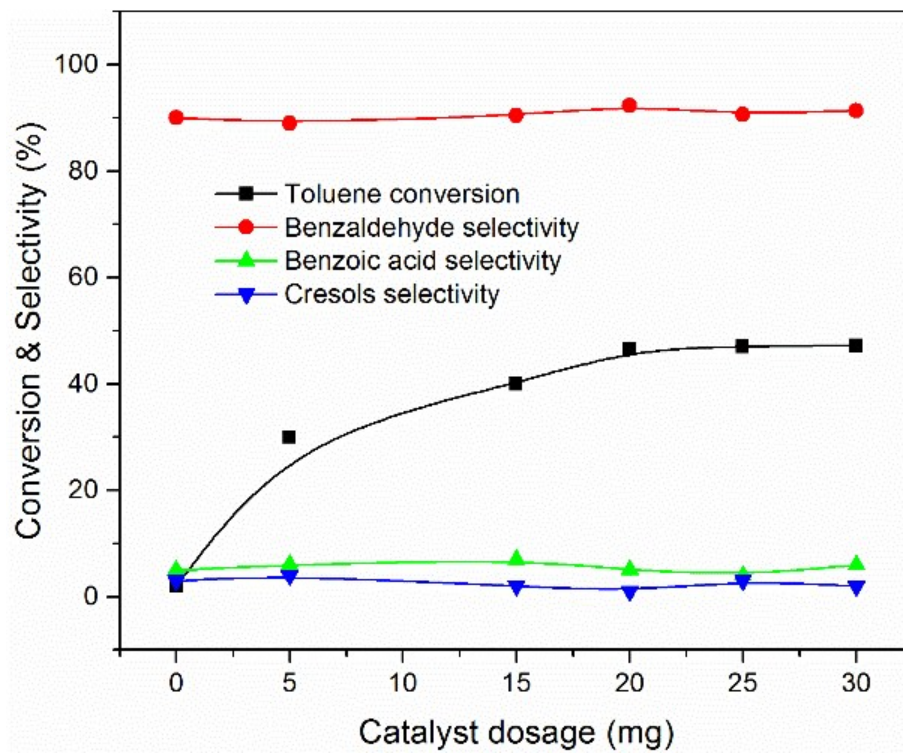

**Fig. S2** Effect of catalyst amount on toluene oxidation. Reaction conditions: acetonitrile (5 ml), toluene (2.5 mmol), H<sub>2</sub>O<sub>2</sub> (10 mmol), 75 °C, 5 h.

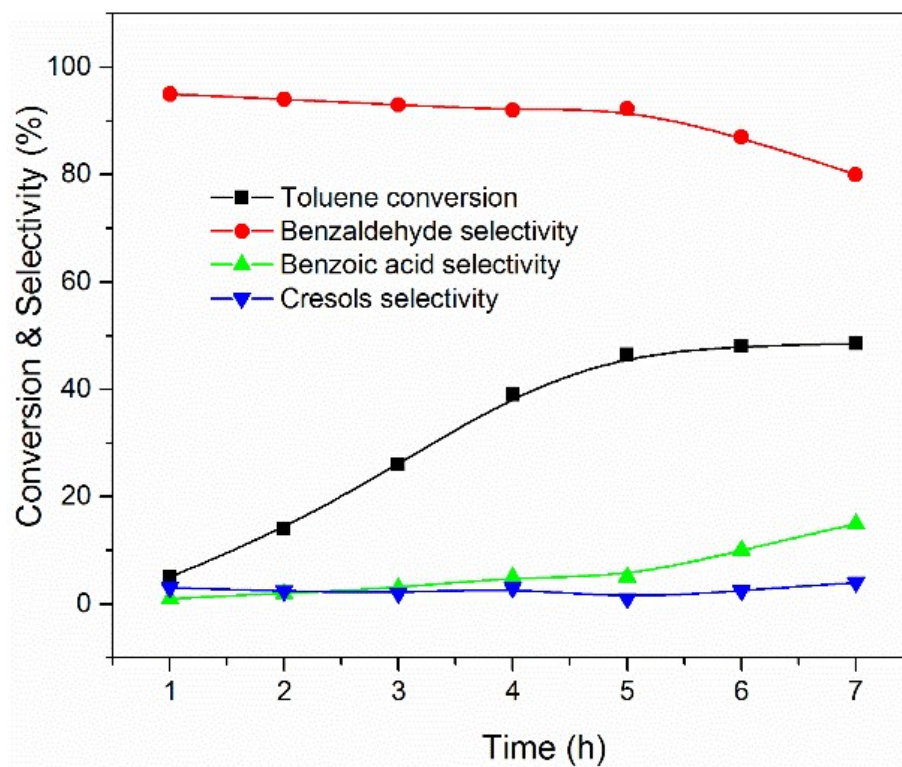

**Fig. S3** Effect of reaction time on toluene oxidation. Reaction conditions: acetonitrile (5 ml), toluene (2.5 mmol), H<sub>2</sub>O<sub>2</sub> (10 mmol), catalyst (20 mg), 75 °C.

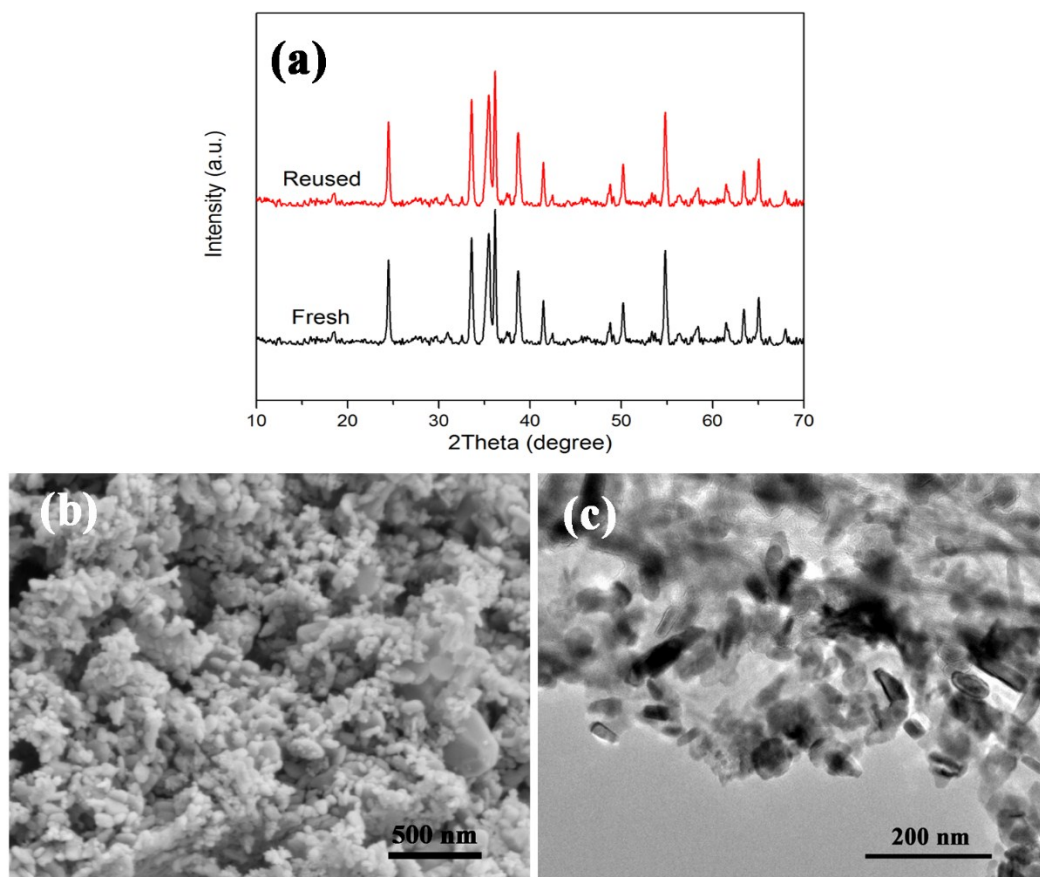

**Fig. S4** (a) XRD patterns of the fresh and reused CuCr<sub>2</sub>/CN catalyst after six catalytic cycles, (b) FESEM image and (c) TEM image of the reused CuCr<sub>2</sub>/CN catalyst.

**Table S1** The Cu/Cr molar ratios of the prepared Cu-Cr bimetallic catalysts.

| Entry | Sample                | Cu/Cr (nominal) | Cu/Cr (obtained by XPS) |
|-------|-----------------------|-----------------|-------------------------|
| 1     | CuCr <sub>2</sub> /CN | 0.50            | 0.49                    |
| 2     | CuCr/CN               | 1.00            | 1.00                    |
| 3     | Cu <sub>2</sub> Cr/CN | 2.00            | 2.02                    |
